# Supplementary material for: The role of maternal health care services as predictors of time to modern contraceptive use after childbirth in Northwest Ethiopia: Application of the shared frailty survival analysis
Source: PubMed Central journal article supplement (PMC6999900; doi:10.1371/journal.pone.0228678), 2020-02-04
Supplement: pone.0228678.s002.pdf [file pone.0228678.s002.pdf]

Data Collection Tools - Amharic Versions  
አካባቢያዊ መረጃ

ይህን መጠይቅ ለመሙላት የቀበሌ አስተዳዳሪ/አመራር አካላትን ይጠይቁ።

| ተ.ቁ | መጠይቅ                                                                                                            | መልስ                        | ማመልከቻ                                                 |
|-----|-----------------------------------------------------------------------------------------------------------------|----------------------------|-------------------------------------------------------|
| 001 | የጥያቄው መለያ ቁጥር                                                                                                   | .....                      |                                                       |
| 002 | የወረዳው ስም                                                                                                        | .....                      |                                                       |
| 003 | የቀበሌው ስም                                                                                                        | .....                      |                                                       |
| 004 | ቀበሌው የሚገኝበት ቦታ                                                                                                  | 1 ከተማ<br>2 ገጠር             |                                                       |
| 005 | የወረዳው አየር ፀባይ ሁኔታ                                                                                               | 1- ደጋ<br>2- ወይናደጋ<br>3- ቆላ |                                                       |
| 006 | የቀበሌው ህዝብ ብዛት                                                                                                   | .....                      |                                                       |
| 007 | ወደ አቅራቢያው ወደሚገኝ ተቋም(ሆስፒታል፣ ጤናጣቢያ፣ ጤና ኬላ)ለመጎጓዝ የሚጠቀሙበት የትራንስፖርት አይነት (አብዛኛውን ጊዜ የሚገለገሉበትን የትራንስፖርት አማራጭ ብቻ ይምረጡ) | ወደ ሆስፒታል                   | 1 በእግር ጉዞ<br>2 በበቅሎ/ በፈረስ<br>3 በተሽከርካሪ ሌላ (ይጠቀስ)..... |
|     |                                                                                                                 | ወደ ጤና ጣቢያ                  | 1 በእግር ጉዞ<br>2 በበቅሎ/ በፈረስ<br>3 በተሽከርካሪ ሌላ (ይጠቀስ)..... |
|     |                                                                                                                 | ወደ ጤና ኬላ                   | 1 በእግር ጉዞ<br>2 በበቅሎ/ በፈረስ<br>3 በተሽከርካሪ ሌላ (ይጠቀስ)      |
| 008 | አምቡላንስን ጨምሮ ለድንገተኛ ጊዜ ነፍሰ-ጡር እናቶችን ወደ ጤና ተቋም ለማጓጓዝ ትራንስፖርት በተፈለገው ሰአት ይገኛልን;                                    | 1 አዎ ይገኛል<br>2 አይገኝም       |                                                       |
| 009 | ወደ ጤና ተቋም የሚወስደውን መንገድ እንዴት ይገመግሙታል;                                                                            | 1 አመች የሆነ<br>2 አመች ያልሆነ    |                                                       |
| 010 | ከዚህ ቀበሌ እስከ ዋናው የመኪና መንገድ እርቀት እንዴት የገልፀታል                                                                      | 1 ቅርብ<br>2 መካከለኛ<br>3 ሩቅ   |                                                       |

የእናቶች ቃለ መጠይቅ

ክፍል አንድ፡ የቤትሁኔታ እና የቤተሰብ አባላትን በሚመለከት

| ጠያቂ፡ ስለእርስዎም ሆነ አጠቃላይ ስለቤተሰቡ ሁኔታ እጠይቅዎታለሁ(መልሱን ያክብቡ ወይንም በተሰጠው ባዶ ቦታ ይሙሱ |                                                                                                                 |                                                                                         |         |
|--------------------------------------------------------------------------|-----------------------------------------------------------------------------------------------------------------|-----------------------------------------------------------------------------------------|---------|
| ተ.ቁ                                                                      | መጠይቅ                                                                                                            | አማራጭ                                                                                    | ቀጣይ ጥያቄ |
| 101                                                                      | በቤቱ ውስጥ ምን ያህል በቋሚነት የሚኖሩ የቤተሰብ አባላት ይኖራሉ?<br>(ቋሚ አባላት የምንላቸው በአካባቢው ቢያንስ ለ6 ወራት የቆዩ ሲሆን ይህ ቁጥር ባልና ሚስትን የጨምራል) | የቤተሰብ አባላት<br>በቁጥር.....                                                                 |         |
| 102                                                                      | ቤተሰቡ በዋነኝነት ለመጠጥ ውሃ የሚያገኘው ከየት ነው?                                                                              | 1. ቧንቧ ውሃ<br>2. ጉድጓድ ውሃ<br>3. የምንጭ ውሃ<br>4. የወንዝ/የጅረት ውሃ<br>5. ሌላ(ይጠቀስ)                 |         |
| 103                                                                      | ለመጠጥነት የምትጠቀሙበት ውሃ የሚገኝበት ቦታ የት ነው?                                                                             | 1. በግቢ ውስጥ-----<br>2. ከግቢ ውጭ                                                            | 105     |
| 104                                                                      | ውሃ ከሚገኝበት ቦታ ቀድቶ ለመመለስ ምን ያህል ጊዜ ይወስዳል? በደቂቃ ይመዘግቡ                                                              | ደቂቃ.....<br>99. አላውቅም                                                                   |         |
| 105                                                                      | የተቀዳን ውሃ ለመጠጥ ዝግጁ ለማድረግ በቤትዎ ውስጥ ምን ዘዴ ይጠቀማሉ (በአብዛኛውን ጊዜ የሚጠቀሙበትን አንድ አማራጭ ይጠቀሙ)                                | 1. ምንም አልጠቀምም<br>2. በማፍላት<br>3. ኬሚካል በመጨመር<br>4. በጨርቅ በማጥለል ሌላ _____                    |         |
| 106                                                                      | ቤተሰቡ በዋናነት መፀዳጃ የሚጠቀሙበት የት ነው?                                                                                  | 1. ሜዳ/በየቦታው<br>2. በውሃ የሚሰራ መፀዳጃ<br>3. የተለምዶ ጉድጓድ መፀዳጃ<br>4. ሌላ (ይገለፅ) _____             |         |
| 107                                                                      | ምግብ ለማብሰል የምትጠቀሙበት የሀይል ምንጭ ምንድን ነው?<br>[ከአንድ በላይ አማራጭ መምረጥ ይቻላል]                                               | 1. ኤሌክትሪክ<br>2. የተፈጥሮ ጋዝ<br>3. ነጭ ጋዝ<br>4. ከሰል<br>5. የማገዶ እንጨት<br>6. ከብት<br>7. ሌላ _____ |         |
| 108                                                                      | በቤት ውስጥ ለብርሃን ምንጭነት የምትጠቀሙበት ዋና የሀይል ምንጭ ከየት ነው?                                                                | 1. ኤሌክትሪክ<br>2. የተፈጥሮ ጋዝ<br>3. ከራዝ                                                      |         |

|     |                                                                                                                   |                                                                         |       |
|-----|-------------------------------------------------------------------------------------------------------------------|-------------------------------------------------------------------------|-------|
|     |                                                                                                                   | 4.ሶላር(በፀሃይ-ብርሃን የሚሰራ)<br>5.ሌላ _____                                     |       |
| 109 | የመኖሪያ ቤቱ ጣራ የተሰራበት ያዩትን ይመዝግቡ                                                                                     | 1. ቆርቆሮ<br>2. ሳር ክዳን<br>3. ሌላ _____                                     |       |
| 110 | የቤቱ ወለል የተሰራበት ያዩትን ይመዝግቡ (አንድ አማራጭ ብቻ ይምረጡ)                                                                      | 1. አፈር/ጭቃ<br>2. ሴራሚክ<br>3. በሲሚንቶ/ሊሾ<br>4. ሌላ _____                      |       |
| 111 | የቤቱ ግድግዳ የተሰራበት ያዩትን ይመዝግቡ (አንድ አማራጭ ብቻ ይምረጡ)                                                                     | 1 እነጨትና ጭቃ<br>2 ድንጋይ/ስሚንቶ/ጡብ<br>3 ሰምበሌጥ<br>4.ሌላ _____                   |       |
| 112 | ቤተሰቡ የሚተዳደርበት ዋና የገቢ ምንጭ የሆነው ምንድን ነው?                                                                            | 1 ግብርና<br>2 በደሞዝ ተቀጣሪ<br>3.አነስተኛና ጥቃቅን ስራዎች<br>4.የቀን ሰራተኛ<br>5.ሌላ _____ |       |
| 113 | መተዳደሪያ ከግብርና ውጭ ከሆን የወር ገቢ ምን ያክል ነው?                                                                             | ብር.....                                                                 |       |
| 114 | ከሚከተሉት እንስሳት ውስጥ በቤት ውስጥ ምን ያህል አለ?<br>የተጠቀሱት የእንስሳት አይነት በቤት ውስጥ ከሌሉ “ 00” ብለው ይሙሉ-<br>(ከአንድ አማራጭ በላይ መምረጥ ይቻላል) | የእንስሳት ዓይነት                                                             | ቁጥር   |
|     |                                                                                                                   | ላም/ በሬ                                                                  | ..... |
|     |                                                                                                                   | ፈረስ፣ አህያ እና በቅሎ                                                         | ..... |
|     |                                                                                                                   | በግና ፍየል                                                                 | ..... |
|     |                                                                                                                   | ዶሮ                                                                      | ..... |
|     |                                                                                                                   | የንብ ቀፎ                                                                  | ..... |
| 115 | ቤተሰቡ ለእርሻ የሚሆን መሬት አለው?                                                                                           | 0 የለም-----<br>1 አዎ                                                      | 117   |
| 116 | ለእርሻ የሚሆነው ቤተሰብ መሬት ስፋት ምን ያህል ካሬ/ጥማድ ይሆናል?                                                                       | ካሬ ሜትር.....<br>ወይም<br>ጥማድ.....                                          |       |
| 117 | አሁን አብረው ከሚኖሩት የቤተሰቡ አባላት ውስጥ የባንክ ደብተር/አካውንት ያለው አለ?                                                             | 0 የለም<br>1 አዎ አለ                                                        |       |
| 118 | ቤተሰቡ በሞዴል አርሶአደርነት ተመዝግቧል?                                                                                        | 0- ሞዴል አርሶ አደር አይደለም<br>1-አዎ ሞዴል አርሶ አደር ነው                             |       |

|       |                                       |         |        |  |
|-------|---------------------------------------|---------|--------|--|
| 119   | ከሚከተሉት እቃወች/ንብረቶች የትኞቹ በቤትሽ ውስጥ ይገኛሉ? | የለም (0) | አዎ (1) |  |
| 119.1 | ራድዮ/ቴሌቪዥን                             |         |        |  |
| 119.2 | ስልክ(ተንቀሳቃሽ/የመስመር)                     |         |        |  |
| 119.3 | አልጋና ፍራሽ-ስፖንጅ/ጥጥ/ስፕሪንግ                |         |        |  |
| 119.4 | ጋሪ/ሞተር ሳይክል/መኪና/ባጃጅ                   |         |        |  |
| 119.5 | ሶፋ/ የጀርባና እጅ መደገፊያ ያለው የእንጨት ወንበር     |         |        |  |

**የማህበራዊ ኢኮኖሚያዊ እና ስነምግባራዊ ባህሪያት**

| ቁጥር | ጥያቄ                                                              | መልስ                                                                  | ማመልከቻ |
|-----|------------------------------------------------------------------|----------------------------------------------------------------------|-------|
| 120 | ዕድሜ                                                              | ዓመት.....<br>99. አላውቅም                                                |       |
| 121 | የሚኖሩበት ቦታ                                                        | 1 ከተማ<br>2 ገጠር                                                       |       |
| 122 | በዚህ አሁን በሚኖሩበት ቀበሌ ምን ያህል ጊዜ ቆዩ? ከአንድ አመት በታች ከሆነ "00" ብለው ይመዝግቡ | ዓመት . . . . .                                                        |       |
| 123 | የጋብቻዎ ሁኔታ (አሁን ያለዉን የጋብቻዎ ሁኔታ ይመዝግቡ)                             | 1. አላገባሁም/ብቸኛ ነኝ----<br>2. አግብቻለሁ<br>3. ፈትቻለሁ<br>4. ባሌ ሞቷል           | 125   |
| 124 | በስንት አመትዎ ባል አገቡ (ይህ የመጀመሪያ ጋብቻን ብቻ የሚመለከት ይሆናል)                 | ዓመት.....                                                             |       |
| 125 | እርስዎ የሚሰሩት ስራ ምንድን ነው?                                           | 1. የመንግስት ሰራተኛ<br>2. ነጋዴ<br>3. ግብርና<br>4. የቀን ሰራተኛ<br>ሌላ (ይጠቀስ)----- |       |
| 126 | ባለቤትዎ የሚሰሩት ስራ ምንድን ነው?                                          | 1. የመንግስት ሰራተኛ<br>2. ነጋዴ<br>3. ግብርና<br>4. የቀን ሰራተኛ<br>ሌላ (ይጠቀስ)----- |       |
| 127 | የየተኛው ሃይማኖት ተከታይ ነዎት?                                            | 1. ኦርቶዶክስ<br>2. ካቶሊክ<br>3. ፕሮቴስታንት<br>4. ሙስሊም<br>5. ሌላ (ይጠቀስ) _____  |       |
| 128 | ብሄርዎ ምንዴነው?                                                      | 1. አማራ<br>2. አገው<br>3. አሮሞ                                           |       |

|     |                           |                                                                                          |  |
|-----|---------------------------|------------------------------------------------------------------------------------------|--|
|     |                           | 4. ሌላ (ይጠቀስ) _____                                                                       |  |
| 129 | የትምህርት ደረጃ                | 1. አልተማርኩም<br>2. ማንበብናመጻፍ<br>3. አንደኛ ደረጃ(1-8)<br>4. ሁለተኛ ደረጃ (9-12)<br>4. ከፍተኛ ት/ት ተቋም   |  |
| 130 | የባለቤትነት/ደንበኞች የትምህርት ደረጃ? | 1. አልተማርኩም<br>2. /ማንበብናመጻፍ/<br>3. አንደኛ ደረጃ(1-8)<br>3. ሁለተኛ ደረጃ (9-12)<br>4. ከፍተኛ ት/ት ተቋም |  |

**ክፍል 2: የእርግዝና፣ ወሲኗና ፤ድህረ- ወሲኗ ጤና አገልግሎት አጠቃቀምን በተመለከተ ጥያቄዎን እንደሚከተለው ይጀምሩ፤አሁን ከወሲኗ በፊት፣ በወሲኗ ወቅት እና ከወሲኗ በኋላ ስለነበሩ ሁኔታዎች አንዳንድ ጥያቄዎችን ልጠይቅዎት እፈልጋለሁ።**

| <b>የቅድመ- እርግዝና እና ስነተዋልዶ ታሪክ</b>      |                                                             |                                                   |                                        |
|---------------------------------------|-------------------------------------------------------------|---------------------------------------------------|----------------------------------------|
| ተ.ቁ                                   | መጠይቅ                                                        | መልስ                                               |                                        |
| 201                                   | እስካሁን ድረስ ለምን ያህል ጊዜ እርግዘዋል? (ውርጃንና በወሲኗ ጊዜ የሞተን ጨምሮ)       | ----- (በቁጥር ይቀመጥ)                                 |                                        |
| 202                                   | የመጨረሻውን ልጅዎን ጨምሮ ምን ያህል ሌጆችን በሕይወት ወልደዋል?                   | ----- (በቁጥር ይቀመጥ)                                 | <i>ይህ የመጀመሪያ ልጅ ከሆነ ጥያቄ ቁጥር203 ይለፉ</i> |
| 203                                   | በቀድሞው ልጅዎና በአሁኑ ልጅዎ መካከል ምን ያህል የእድሜ ልዩነት አለው?              | -----አመት                                          |                                        |
| 204                                   | የቤተሰብ ምጣኔ ተጠቅመው ያወቃሉ?                                       | 0. ተጠቅሜ አላወቅም<br>1. አዎ ተጠቅሜ አወቃለሁ                 |                                        |
| 205                                   | የመጨረሻ እርግዝናዎ [የሕፃኑ ስም] በወቅቱ የታሰበ/የታቀደ ነበር?                  | 0 የታቀደ አልነበረም<br>1 አዎ የታቀደ ነበረ.....               | 208                                    |
| 206                                   | የመጨረሻ እርግዝናዎ በወቅቱ የታሰበ/ የታቀደ ካልነበር እርግዝናዎ መቸ እንዲሆን ነበር የፈለጉ | 1.እንዲዘገይ<br>2. ጭራሽ መወለድ አልፈልግም ነበር                |                                        |
| 207                                   | የእርስዎ ምርጫ እንዲዘገይ ከነበር ለምን ያህል ጊዜ ነበር?                       | 1 ሁለት አመት እና በላይ<br>2 ከሁለት አመት ያለበለጠ<br>99. አላወቅም |                                        |
| <b>የቅድመ- ወሲኗ(የእርግዝናዎ ክትትልን በሚመለከት</b> |                                                             |                                                   |                                        |
| 208                                   | ይህንን ህፃን (ስም) ሲያረግዡ የእርግዝና ክትትል አድርገው ነበር?                  | 0. አይደለም-----<br>1. አዎ                            | 217                                    |

|     |                                                                              |                                                                                                                                                                          |     |
|-----|------------------------------------------------------------------------------|--------------------------------------------------------------------------------------------------------------------------------------------------------------------------|-----|
| 209 | ለምን ያህል ጊዜ ክትትል አደረጉ?                                                        | ጊዜ.....<br>99. አላስታውስም                                                                                                                                                   |     |
| 210 | የመጀመሪያውን ክትትል ያደረጉት እርግዝናዎ ስንት ወር ሲሞላዎት ነበር?                                 | ወር.....<br>99. አላውቅም/አላስታውስም                                                                                                                                             |     |
| 211 | የእርግዝና ክትትልን ያደረጉት የት ቦታ ነበር?                                                | 1. መንግስት ሆስፒታል<br>2. መንግስት ጤና ጣቢያ<br>3. ከግል ክሊኒክ<br>4. ቤት ውስጥ<br>5. ሌላ _____                                                                                             |     |
| 212 | የመጨረሻውን ክትትል ሲያደርጉ ምርመራ ያደረገልዎት ምን ዓይነት ባለሞያ ነበር?                            | 1. ዶክተር<br>2. ጤና መኮኑን<br>3. ነርስ/አዋላጅ ነርስ<br>4. የጤና ኤክስቴንሽን ባለሞያ ሌላ (ይጠቀስ) _____<br>99. አላውቅም                                                                             |     |
| 213 | ጤና ተቋም ለመድረስ በእግር ጉዞ ስንት ደቂቃ ይወስዳል?                                          | ደቂቃ .....<br>99. አላውቅም                                                                                                                                                   |     |
| 214 | የእርግዝና ክትትል በሚያደርጉበት ወቅት በእርግዝና ወቅት ስለሚከሰቱ አደገኛ ምልክቶች ከጤና ባለሙያዎች ተነገሩዎት ነበር? | 0. አይደለም .....<br>1. አዎ                                                                                                                                                  | 216 |
| 215 | ስለየትኛዎች አደገኛ ምልክቶች ከጤና ባለሙያዎች ተነገሩዎት? <i>ከአንድ በላይ መልስ መምረጥይቻላል</i>           | 1. ከማህፀን ደም መፍሰስ<br>2. ምጥ ከመጀመሩ በፊት እንሽርት ወ.ሃ መፍሰስ<br>3. ከፍተኛ የራስ ምታትና<br>4. ብሽገያለ እይታ<br>5. ትኩሳት (የሰውነት-መቀት መጨመር)<br>6. የሆድ ህመም<br>7. የሰውነት መንዝፍዘፍ/ራስንመሳት ሌላ(ይጠቀስ)..... |     |
| 216 | በአለፈው የእርግዝና ክትትል ወቅት ስለወለድ ቅድመ ዝግጅት እቅድ ማድርገ እንዳለብዎት ከባለሙያ ጋር ተነጋግረዋል       | 0. አይደለም<br>1. አዎ                                                                                                                                                        |     |

|                                                                             |                                                                                                   |                                                                                                 |            |             |
|-----------------------------------------------------------------------------|---------------------------------------------------------------------------------------------------|-------------------------------------------------------------------------------------------------|------------|-------------|
| 217                                                                         | አሁን ይህንን ህፃን (ስም) ሲያረግዡ የነበረውን ሁሉንም ክትትልች ያስታውሱ። በነዚህ ክትትልች ወቅት የጤና ባለሞያዎች ----- ( 'X' ምሌክት ያድርጉ) |                                                                                                 |            |             |
|                                                                             |                                                                                                   | የለም(0)                                                                                          | አዎ(1)      | አላስታውስም(99) |
|                                                                             | ክብደትዎን መዘኑ?                                                                                       |                                                                                                 |            |             |
|                                                                             | የደም ግፊት(በክንድ ላይ በሚታሰር መለኪያ) እየለኩ ክትትል አደረጉ?                                                       |                                                                                                 |            |             |
|                                                                             | የሽንት ናሙና ወሰዱ?                                                                                     |                                                                                                 |            |             |
|                                                                             | የቁጥኝ/ወርዶ ምርመራ አደረጉ?                                                                               |                                                                                                 |            |             |
|                                                                             | በእርግዝና ወቅት ስለሚደረግ አመጋገብ ምክር ሰጡዎት?                                                                 |                                                                                                 |            |             |
|                                                                             | ስለ ኤች አይ ቪ ኤድስ መከላከያና ምርመራ ተነጋገራችሁ?                                                               |                                                                                                 |            |             |
|                                                                             | ስለቤተሰብ ምጣኔ ተወያያችሁ?                                                                                |                                                                                                 |            |             |
|                                                                             | ጤና ድርጅት መወለድና ድህረ-ወሊድ አገልግሎት ማግኘት ስለሚሰጠው ጠቀሜታ ተወያያችሁ?                                             |                                                                                                 |            |             |
| ወባ በእርግዝና ወቅት ስለሚያስከትለው አደጋና እንዴት መከላከል እንደሚቻል (ምሳሌ አልጋ አጎበር በመጠቀም) ተወያያችሁ? |                                                                                                   |                                                                                                 |            |             |
| <b>የወሊድ አገልግሎትን በተመለከተ</b>                                                  |                                                                                                   |                                                                                                 |            |             |
| 218                                                                         | ህፃኑ(ስም) የተወለደበት ቀን፤ ወር፡ዓ.ም                                                                        | _____ / _____ / _____                                                                           |            |             |
| 219                                                                         | ይህንን ህፃን (ስም) ሲወልዱ እርግዝናው የስንት ወር ነበር?                                                            | ወር-----<br>99. አላውቅም                                                                            |            |             |
| 220                                                                         | ህፃኑ(ስም) የወለዱበት ቦታ የት ነበር?                                                                         | 1. የመንግስት ሆስፒታል<br>2. የመንግስት ጤና ጣቢያ<br>3. ጤና ኬላ<br>4. የግል ሆስፒታል/ክሊኒክ<br>5. ቤት<br>ሌላ (ይጠቀስ)..... |            |             |
| 221                                                                         | ህፃኑ(ስም)ሲወልዱ የወልደት ሁኔታ እንዴት ነበር? በራሱ በተፈጥሮ አምጦ                                                     | 1. በተፈጥሮ አምጦ በመወለድ----<br>2. በአፕራሲኦን(ቀዶ ጥገና) -----<br>3. በመሳሪያ በመታገዝ ሌላ(ይገለጹ)_____              | 223<br>223 |             |

|                                     |                                                                               |                                                                                         |            |
|-------------------------------------|-------------------------------------------------------------------------------|-----------------------------------------------------------------------------------------|------------|
|                                     | በመወለድ፣ በኦፕራሲኦን ወይንስ በመሳሪ በመታገዝ                                                |                                                                                         |            |
| 222                                 | የወለዱት በኦፕራሲኦን ከሆነ ወሳኔው የተወሰነ ምጥ ከመጀመሩ በፊት ነዉ ወይንስ በኋላ ነበር                     | 1. ምጥ ከመጀመሩ በፊት<br>2. ምጥ ከጀመረ በኋላ<br>99. አላውቅም.....                                     |            |
| <b>የድህረ ወሊድና ጨቅላ ህጻናት ጤና አገልግሎት</b> |                                                                               |                                                                                         |            |
| 223                                 | ህፃኑን (ስም) ከወለዱ በኋላ በባለሙያ የድህረ ወሊድ ምርመራ አድርገዋል?                                | 1. አላደረግሁም-----<br>2. አድርጌያለሁ                                                           | 227        |
| 224                                 | ከወለዱ ከስንት ቀን በኋላ የመጀመሪያውን ድህረ ወሊድ ምርመራ ፈፀሙ?                                   | 1. ከ 24 ሰዓት ያነሰ<br>2. 25- 48 ሰዓት<br>3. 49-72 ሰዓት<br>4. 73ሰዓት- 6 ሳምንት<br>5. ከ 6 ሳምንት በላይ |            |
| 225                                 | ህፃኑን (ስም) ከወለዱ በኋላ በአጠቃላይ ለስንት ጊዜ ምርመራ ተደረገልዎ                                 | .....<br>99. አላስታወስም                                                                    |            |
| 226                                 | ህፃኑን (ስም) ከወለዱ በኋላ የመጀመሪያውን የድህረ-ወሊድ አገልግሎቱን የት ቦታ ወሰዱ                        | 1. መኖሪያ ቤት<br>2. ጤና ኬላ<br>3. ጤና ጣቢያ<br>4. ሆስፒታል<br>5. የግል ክሊኒክ/ሆስፒታል ሌላ(ይጠቀስ).....      |            |
| <b>በጤና ድርጅት ብቻ ለወለዱት የሚጠየቅ</b>      |                                                                               |                                                                                         |            |
| 227                                 | ህፃኑን (ስም) ከወለዱ በኋላ በጤና ተቋሙ ውስጥ ለስንት ጊዜ ቆዩ? መልሱ በሰዓት ይቀመጥ                      | ..... ሰዓት                                                                               |            |
| 228                                 | ህፃኑን (ስም) ከወለዱ በኋላ በጤና ተቋሙ ውስጥ እንዳሉ የጤና ባለሙ ምርመራ አድርጎልዎታል?                    | 0. አልተደረገልኝም<br>1. ተደርጎልኛል<br>99. አላስታወስም                                               |            |
| 229                                 | ህፃኑን (ስም) ከወለዱና ወደ ቤትዎ ከተመለሱ በኋላ በጤና ባለሙ ምርመራ አድርጎልዎታል?                       | 0. አልተደረገልኝም-----<br>1. ተደርጎልኛል<br>99. አላስታወስም-----                                     | 232<br>232 |
| 230                                 | ህፃኑን (ስም) ከወለዱና ወደ ቤትዎ ከተመለሱ በኋላ በጤና ባለሙ ምርመራ የተደረገልዎ ከስንት ጊዜ በኋላ ነዉ? በቀን ይጻፍ | በ..... ቀን ውስጥ                                                                           |            |



|                                  |                                                                                                                  |                                                                                          |       |                    |
|----------------------------------|------------------------------------------------------------------------------------------------------------------|------------------------------------------------------------------------------------------|-------|--------------------|
| 231                              | አሁን ህፃን (ስም) ከወለዱ በኋላ በድህረ ወሊድ ምረመራ የተሰጠውን ሁሉንም አገልግሎቶች ያስታውሱ :: በድህረ ወሊድ ምርመራ ወቅት ባለሞያዎች ----- ( 'X' ምልክት ያድርጉ) |                                                                                          |       |                    |
|                                  |                                                                                                                  | የለም(0)                                                                                   | አዎ(1) | አላስታውስም /አላውቅም(99) |
|                                  | ስለ ማህፀን ፈሳሽ ጠየቁዎት?                                                                                               |                                                                                          |       |                    |
|                                  | ስለ ጡት ማጥባት ምክር ሰጡዎት?                                                                                             |                                                                                          |       |                    |
|                                  | ስለሚወስዱት ምግብ ምክር ሰጡዎት?                                                                                            |                                                                                          |       |                    |
|                                  | ስለጡት ቤተሰብ ምጣኔ ምክር ሰጡዎት?                                                                                          |                                                                                          |       |                    |
| የቀጠሮ ጊዜ አሳወቅዎት?                  |                                                                                                                  |                                                                                          |       |                    |
| <b>የድህረ- ወሊድ የቤተሰብ ምጣኔ አጠቃቀም</b> |                                                                                                                  |                                                                                          |       |                    |
| 232                              | ህፃኑ (ስም) ከተወለደ በኋላ የወር አበባ ማየት ጀምረዋል?                                                                            | 0. ማየት አልጀመርኩም-----<br>1. ማየት ጀምራለሁ                                                      | 234   |                    |
| 233                              | የወር አበባ ማየት ከጀመሩ ህፃኑ (ስም) ከተወለደ ከስንት ወር/ሳምንት በኋላ ማየት ጀምሩ? ወሩ ወደ ሳምንት ይቀየር                                        | ሳምንት -----                                                                               |       |                    |
| 234                              | ህፃኑ (ስም) ከተወለደ በኋላ የመጀመሪያ ግብረስጋ ግንኙነት ማድረግ የጀመሩበት ጊዜ                                                             | 1. ግንኙነት አላደረግሁም<br>2. በሳምንት ውስጥ<br>3. ከ 8-14 ቀን ውስጥ<br>4. ከ15-42 ውስጥ<br>5. ከ 42 ቀናት በኋላ |       |                    |
| 235                              | አሁን ህፃኑን (ስም) ጡት ያጠባሉ?                                                                                           | 0. አላጠባም<br>1. አጠባለሁ                                                                     |       |                    |
| 236                              | ህፃኑ (ስም) ከወለዱ በኋላ የቤተሰብ ምጣኔን በተመለከተ በጤና አክስቴንሽን ዎይንም በሌላ የጤና ባለሙያ የምክር አገልግሎት አግኝተዋል?                            | 0. የለም<br>1. አዎ                                                                          |       |                    |
| 237                              | ህፃኑ (ስም) ከወለዱ በኋላ እርስዎ ወይንም ባለቤትዎ የቤተሰብ ምጣኔን መወሰድ ጀምረዋል?                                                         | 0. የለም-----<br>1. አዎ                                                                     | 240   |                    |
| 238                              | ለጥያቄ ቁጥር 237 መልስዎ አዎ ከሆነ የቤተሰብ ምጣኔ መወሰድ የጀመሩበት ጊዜ መቸ ነበር?(ወሩን ወደ ሳምንት ቀይረዉ ይጻፍ )                                 | 1. ከወለድሁበት ቀን ጀምሮ ወይንም ሳምንት -----                                                        |       |                    |

|                                                                          |                                                    |                                                                                                                                                                                                                                                                                             |     |
|--------------------------------------------------------------------------|----------------------------------------------------|---------------------------------------------------------------------------------------------------------------------------------------------------------------------------------------------------------------------------------------------------------------------------------------------|-----|
| 239                                                                      | እርስዎ ወይንም ባለቤትዎ እየወሰዱት ያለው የቤተሰብ ምጣኔ አይነት የትኛው ነው? | <ol style="list-style-type: none"> <li>1. የሴት የእንቁላል ማስተላለፊያ ቱቦን በመዝጋት(በቀዶ ጥገና)</li> <li>2. ወንድን የዘር ፍሬ ማስተላለፊያ ቱቦን በመዝጋት (በቀዶ ጥገና)</li> <li>3. በማህፀን ውስጥ የሚገባ (ሉፕ)</li> <li>4. በየሶስት ወር በመርፌ የሚሰጥ(ዲፖ)</li> <li>5. በክንድ የሚቀበር(ኢምፕላንት)</li> <li>6. በአፍ የሚዋጥ(እንክብል) ሌላ (ይጠቀስ).....</li> </ol> |     |
| 240                                                                      | የወሊድ መከላከያ የማይወስዱ ከሆነ ያልወሰዱበት ምክንያት ምንድን ነው?       | <ol style="list-style-type: none"> <li>1. ሌላ ልጅ መውለድ ስለምፈልግ</li> <li>2. በዚህ ወቅት አላረግዝም ብዬ ስለማስብ</li> <li>3. የወር አበባ ማየት ስላልጀመርኩ</li> <li>4. ባለቤቴ አብሮኝ ስለማይኖር</li> <li>5. ባለቤቴ ስለማይፈቅድ</li> </ol> ሌላ (ይጠቀስ).....                                                                             |     |
| 241                                                                      | ባለቤትዎ የእርስዎን የቤተሰብ ምጣኔ መውሰድ ይደግፋሉ ?                | 0. አይደግፉም-----<br>1. አዎ፣ ይደግፋሉ                                                                                                                                                                                                                                                              | 243 |
| 242                                                                      | ባለቤትዎ የእርስዎን የቤተሰብ ምጣኔ መውሰድ የሚደግፉት በምን መልኩ ነው.     | <ol style="list-style-type: none"> <li>1. የቤተሰብ ምጣኔ በመውሰድ መሳተፍ</li> <li>2. ትራንስፖርት በማመቻቸት</li> <li>3. የቀጠሮ ቀንን በማስታወስ</li> <li>4. የገንዘብ ወይንም የቁስአካል ድጋፍ ሌላ (ይጠቀስ).....</li> </ol>                                                                                                           |     |
| 243                                                                      | ህፃኑ (ስም) ከወለዱ በኋላ ሌላ ልጅ የመውለድ ፍላጎትዎ ይምን ይመስላል?     | <ol style="list-style-type: none"> <li>1. በአጭር ጊዜ ውስጥ መውለድ እፈልጋለሁ</li> <li>2. መውለድ የምፈልገው ከሁለት አመት በኋላ ነው</li> <li>3. ጭራሽ መውለድ አልፈልግም</li> </ol> 99. መወሰን አልችልም                                                                                                                             |     |
| 244                                                                      | በአሁኑ ጊዜ የእርግዝና ሁኔታዎ ምን ይመስላል?                      | <ol style="list-style-type: none"> <li>1. ነፍሰጡር ነኝ</li> <li>2. ነፍሰ ጡር አይደለሁም</li> <li>3. ነፍሰጡር መሆንና አለመሆኔን አላወቅመ</li> </ol>                                                                                                                                                                 |     |
| 245                                                                      | እስካሁን ያሉ ልጆችን ጨምሮ በአጠቃላይ እንዲኖሩዎት የሚፈልጓቸው ልጆች ብዛት   | .....(ቁጥር ያስቀምጡ)                                                                                                                                                                                                                                                                            |     |
| ጊዜዎትን ሰውተው ይህን ጠቃሚ መረጃ ስለሰጡኝ በጣም አመሰግናለሁ።ሌላ አስተያየት ካለዎት ሊነገሩኝ ይችላሉ።_____ |                                                    |                                                                                                                                                                                                                                                                                             |     |
